# Supplementary material for: Xist exerts gene-specific silencing during XCI maintenance and impacts lineage-specific cell differentiation and proliferation during hematopoiesis
Source: PubMed Central journal article supplement (PMC9343370; doi:10.1038/s41467-022-32273-5), 2022-08-01
Supplement: 41467_2022_32273_MOESM2_ESM.pdf [file 41467_2022_32273_MOESM2_ESM.pdf]

## Description of Additional Supplementary Files

**Xist exerts gene-specific silencing during XCI maintenance and impacts lineage-specific cell differentiation and proliferation during hematopoiesis**

Yang *et al.*

**Supplementary Data 1:** Transcriptional analysis of WT and Xist-deficient LSK+, LSK- and Lin- cells.

Related to Fig. 3a-e and Supplementary Fig. 4.

**Supplementary Data 2:** H3K4me3 and H3K27me3 ChIP-seq analysis of WT and Xist-deficient Lin- cells.

Related to Fig. 3f, 4b.

**Supplementary Data 3:** ATAC-seq analysis of WT and Xist-deficient LSK+ and LSK- cells.

Related to Fig. 3f, 4c and Supplementary Fig. 7b-c, 8b.

**Supplementary Data 4:** Allele-specific transcriptional analysis of WT and Xist-deficient MEFs.

Related to Fig. 3h and Supplementary Fig. 5.

**Supplementary Data 5:** Allele-specific H3K27me3 ChIP-seq analysis of WT and Xist-deficient MEFs.

Related to Fig. 5a.

**Supplementary Data 6:** Allele-specific analysis of previously published ATAC-seq data of WT and Xist-deficient MEFs.

Related to Fig. 5b and Supplementary Fig. 8a.

**Supplementary Data 7:** Allele-specific H3K27ac ChIP-seq analysis of WT and Xist-deficient MEFs.

Related to Figure 5a-d, 6b.

**Supplementary Data 8:** YY1 ChIP-seq analysis of WT and Xist-deficient Lin- cells.

Related to Fig. 6a, 6d and Supplementary Fig. 9b.

**Supplementary Data 9:** Allele-specific YY1 ChIP-seq analysis of WT and Xist-deficient MEFs.

Related to Fig. 6b, 6e and 6h.

**Supplementary Data 10:** Allele-specific transcriptional analysis of Xist-dependent genes in Xist-deficient MEFs upon YY1 knockdown by shRNA.

Related to Supplementary Fig. 10.

**Supplementary Data 11:** List containing name, genotype, platform, sequencing type, and depth for all RNA-, ATAC-, and ChIP-seq samples and data.
